# Supplementary material for: Early onset of sleep/wake disturbances in a progressive macaque model of Parkinson’s disease
Source: PubMed Central journal article supplement (PMC9581909; doi:10.1038/s41598-022-22381-z), 2022-10-19
Supplement: 41598_2022_22381_MOESM1_ESM.pdf [file 41598_2022_22381_MOESM1_ESM.pdf]

## Early onset of sleep/wake disturbances in a progressive macaque model of Parkinson's disease

Aurélie Davin, PhD<sup>1,2</sup>, Stéphan Chabardès, PhD, MD<sup>2,3</sup>, Hayat Belaid, PhD<sup>4</sup>, Daniel Fagret, MD<sup>5</sup>, Loic Djaileb, MD<sup>5</sup>, Yves Dauvilliers, PhD<sup>6</sup>, Olivier David, PhD<sup>2,7</sup>, Napoléon Torres-Martinez, PhD<sup>1</sup>, Brigitte Piallat\*, PhD<sup>2</sup>

|                               | Injection number       | Cumulative dose of MPTP (mg/kg) | Score of parkinsonism (mean ± SEM) | General activity (0-3) | Frequency of arms movement (0-3 for each arm) |                  | Flexed posture (0-3) | Bradykinesia (0-3) | Tremor* (0-3) | Eating (0-3)     | Freezing (0-2)   | Vocalization (0-2) |                  |
|-------------------------------|------------------------|---------------------------------|------------------------------------|------------------------|-----------------------------------------------|------------------|----------------------|--------------------|---------------|------------------|------------------|--------------------|------------------|
|                               |                        |                                 |                                    |                        | LEFT                                          | RIGHT            |                      |                    |               |                  |                  |                    |                  |
| <b>M1</b><br>8 y.o.<br>8 Kg   | Presymptomatic         | 1 → 10                          | 3.9                                | 3 ± 0.3                | 1.3 ± 0.1                                     | 0.7 ± 0.1        | 1.1 ± 0.3            | 0                  | 0             | 0                | 0                | 0                  |                  |
|                               | Syndrome stabilization | 11 → 18                         | 7.55                               | 9.1 ± 1.1              | 1.7 ± 0.5                                     | 1 ± 0.1          | 1.1 ± 0.1            | 2 ± 1.0            | 1.6 ± 0.5     | 0.9 ± 0.8        | 0                | 0.8 ± 0.5          | 0                |
|                               | Symptomatic (stable)   | 18                              | 7.55                               | 13.8 ± 0.2             | <b>2 ± 0</b>                                  | <b>1.3 ± 0.2</b> | <b>1.8 ± 0.1</b>     | <b>3 ± 0</b>       | <b>2 ± 0</b>  | <b>1.1 ± 0.2</b> | 0                | <b>1.4 ± 0.1</b>   | <b>1.2 ± 0.1</b> |
| <b>M2</b><br>10 y.o.<br>10 Kg | Presymptomatic         | 1 → 6                           | 1.5                                | 4.6 ± 0.1              | 1.5 ± 0.1                                     | 2.3 ± 0.2        | 0                    | 0                  | 0.6 ± 0.1     | 0                | 0                | 0                  | 0                |
|                               | Syndrome stabilization | 7 → 8                           | 2.2                                | 15.4 ± 1.6             | 2.8 ± 0.5                                     | 2.5 ± 0.2        | 1.7 ± 0.1            | 2.8 ± 1.1          | 1.6 ± 0.5     | 0.9 ± 0.5        | 1.4 ± 0.1        | 0.7 ± 0.5          | 1 ± 0.5          |
|                               | Symptomatic (stable)   | 8                               | 2.2                                | 18.9 ± 0.1             | <b>3 ± 0</b>                                  | <b>3 ± 0</b>     | <b>2 ± 0</b>         | <b>3 ± 0</b>       | <b>2 ± 0</b>  | <b>2.6 ± 0.1</b> | <b>0.5 ± 0.1</b> | <b>1.7 ± 0.2</b>   | <b>1.1 ± 0.1</b> |
| <b>M3</b><br>6 y.o.<br>5 Kg   | Presymptomatic         | 1 → 12                          | 5.5                                | 2.8 ± 0.1              | 1.6 ± 0.1                                     | 0                | 0                    | 0                  | 0             | 0                | 1.2 ± 0.1        | 0                  | 0                |
|                               | Syndrome stabilization | 13 → 18                         | 6.1                                | 9.8 ± 1.3              | 2.1 ± 0.6                                     | 0.8 ± 0.1        | 1.2 ± 0.5            | 2.1 ± 1.0          | 2 ± 0.8       | 0                | 0.8 ± 0.1        | 0.8 ± 0.5          | 0                |
|                               | Symptomatic (stable)   | 18                              | 6.1                                | 16.4 ± 0.3             | <b>3 ± 0</b>                                  | <b>1.8 ± 0.2</b> | <b>2.4 ± 0.1</b>     | <b>3 ± 0</b>       | <b>2 ± 0</b>  | <b>1.8 ± 0.3</b> | <b>1 ± 0.1</b>   | <b>1.4 ± 0.1</b>   | 0                |

\*mainly action tremor; only M2 experienced resting tremor

Supplementary Table 1: Mean values and standard deviations of each clinical item of the parkinsonian scale used during the different disease states: presymptomatic state, syndrome stabilization and stable symptomatic state. Each item is scored between 0 (no difference with healthy state) and 2 or 3 (maximum disability compared to healthy state), with a total score out of 25.
